# Supplementary material
Source: PubMed Central journal article supplement (PMC2562691)

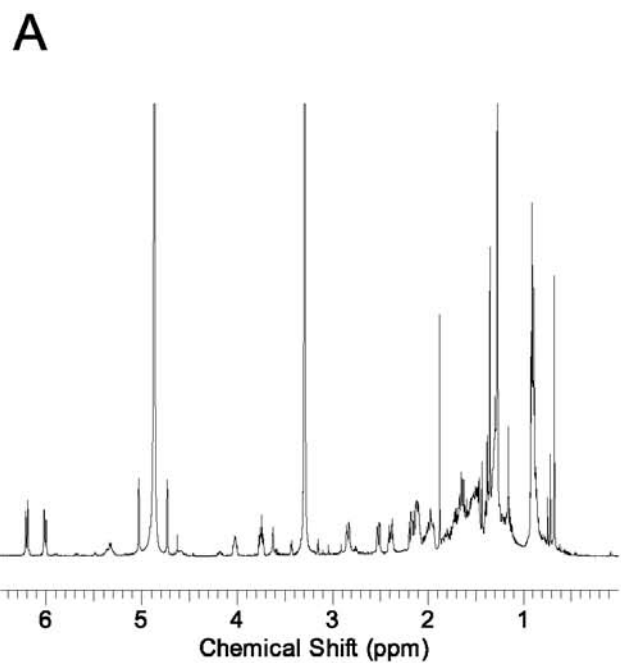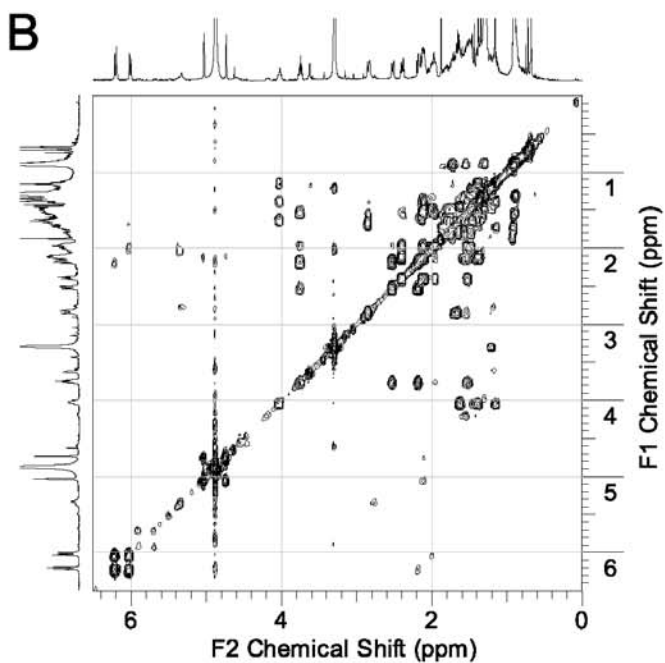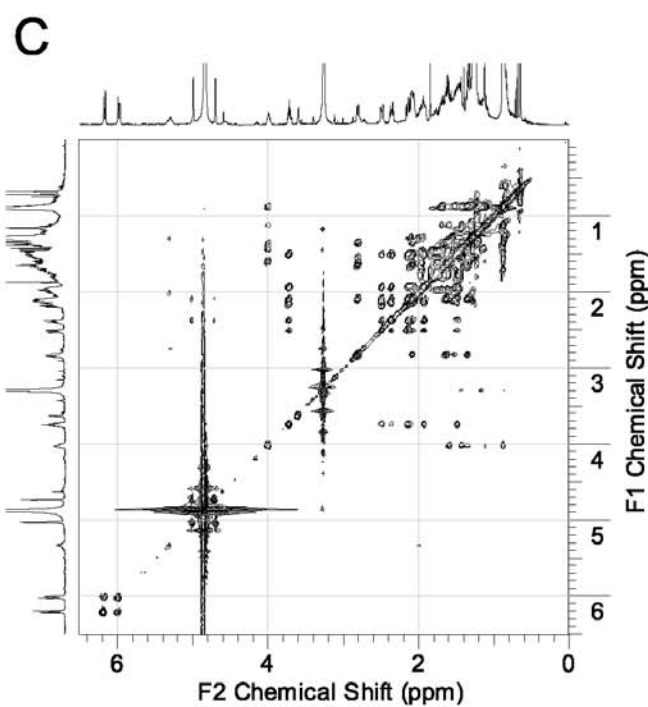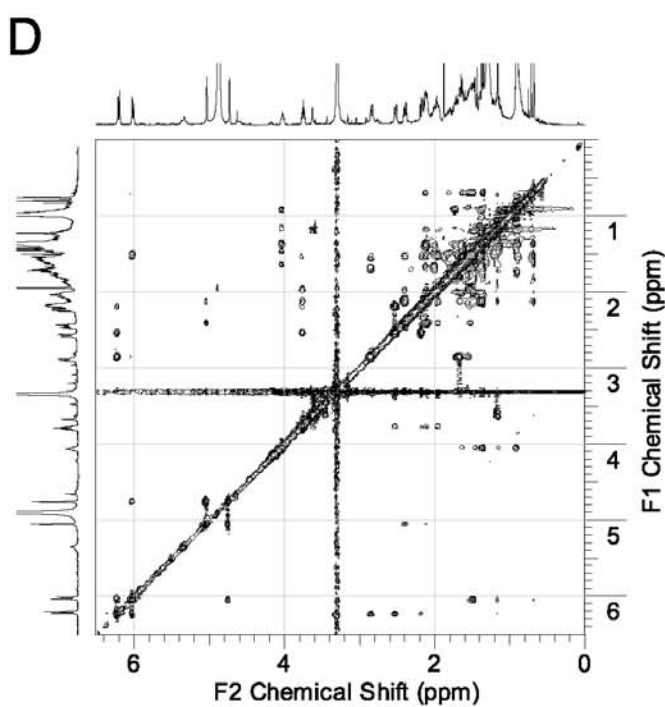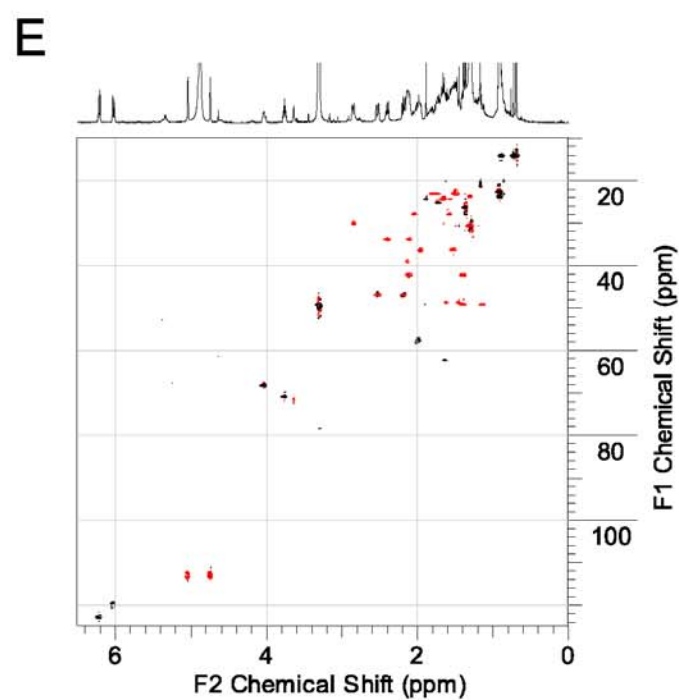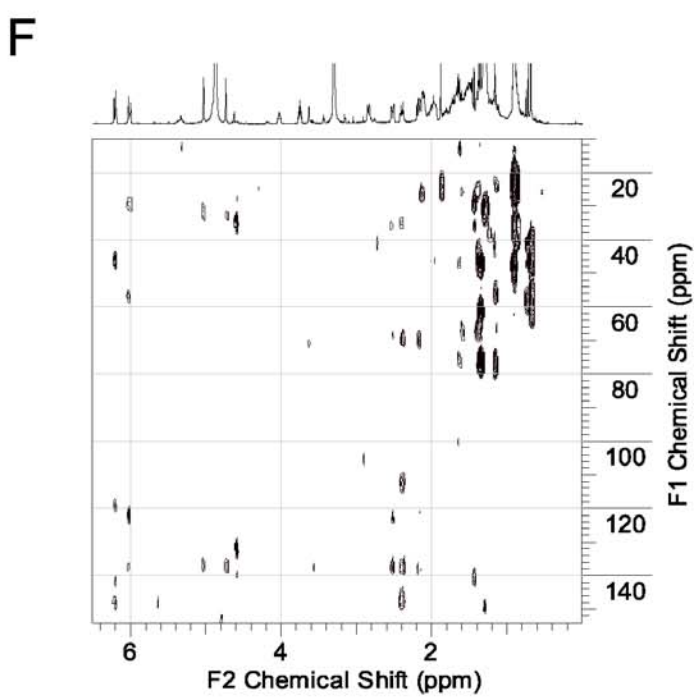

Supplement: NIHMS48154-supplement-1.pdf [file NIHMS48154-supplement-1.pdf]

**A**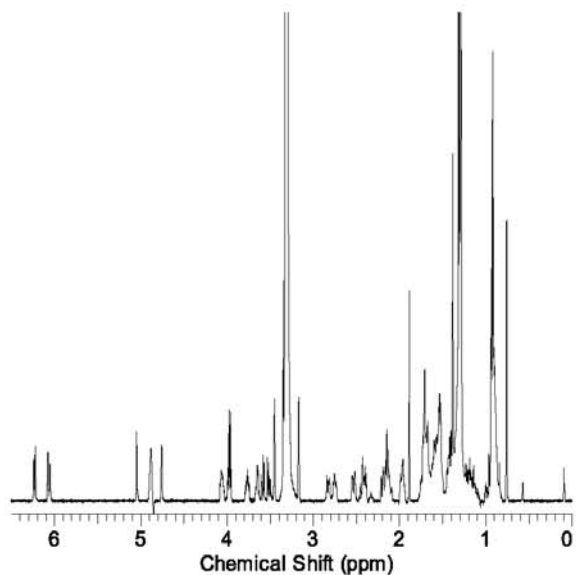**B**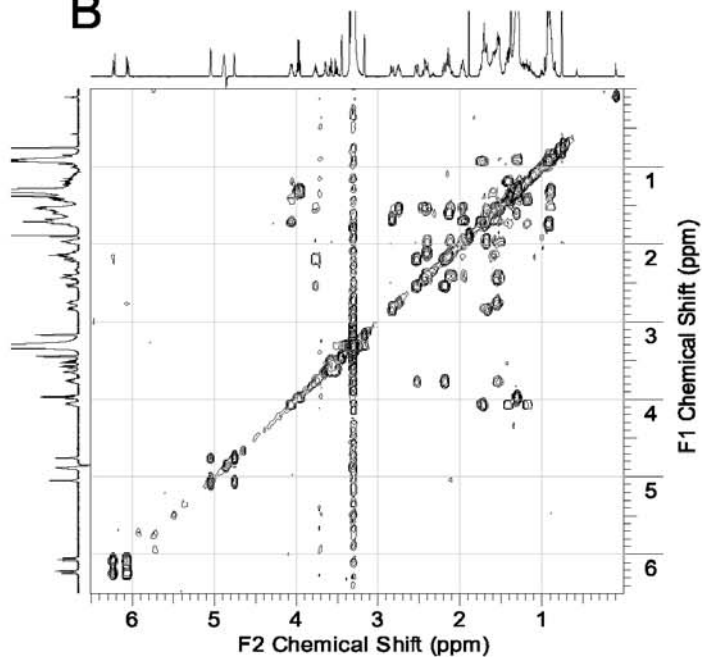**C**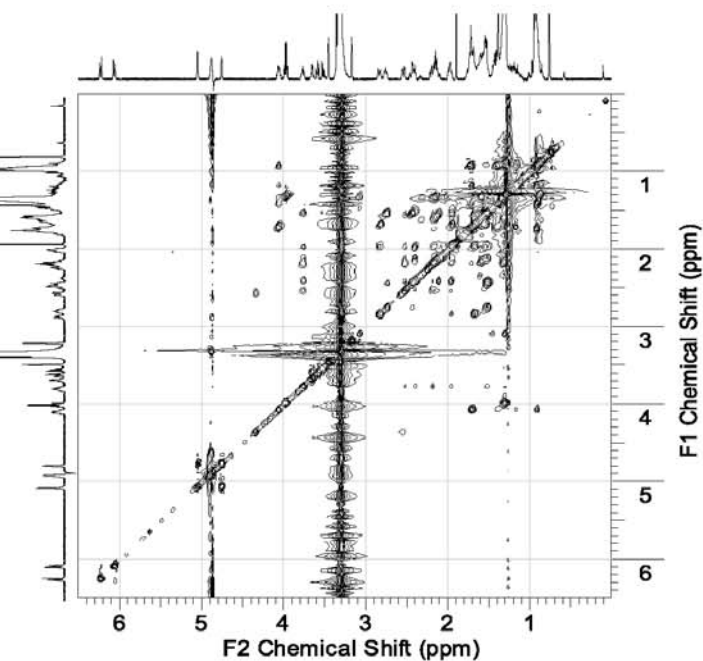**D**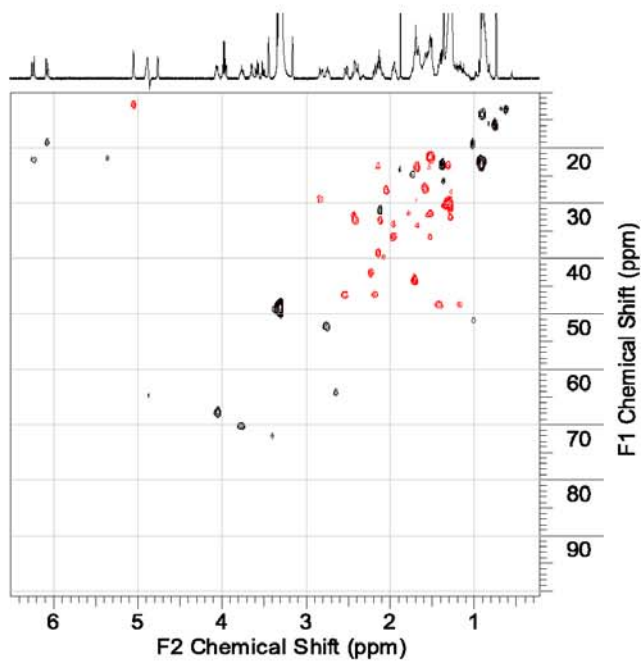**E**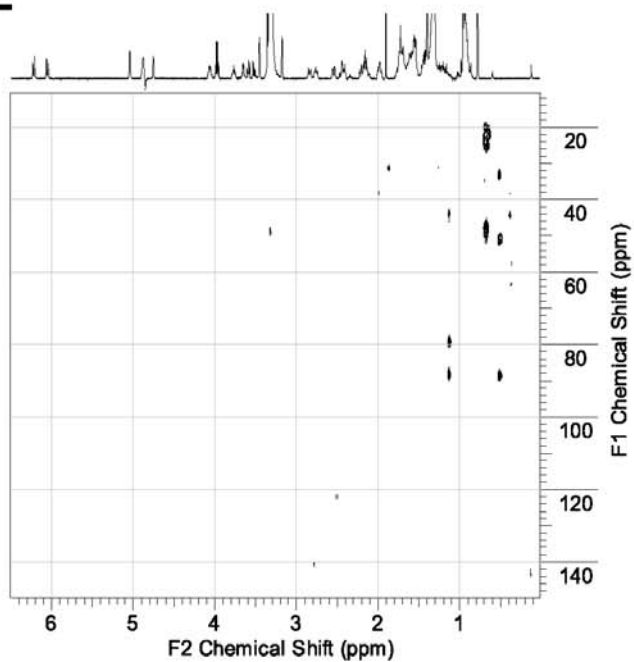

Supplement: NIHMS48154-supplement-2.pdf [file NIHMS48154-supplement-2.pdf]
